# Supplementary material for: Liraglutide downregulates hepatic LDL receptor and PCSK9 expression in HepG2 cells and db/db mice through a HNF-1a dependent mechanism
Source: Cardiovasc Diabetol. 2018 Apr 4;17:48. doi: 10.1186/s12933-018-0689-9 (PMC5885408; doi:10.1186/s12933-018-0689-9)
Supplement: Supplementary file 1 — Additional file 1. Change in fasting glucose in db/db mice and nondiabetic mice. [file 12933_2018_689_MOESM1_ESM.xlsx]

## Sheet: 工作表1
Week	wt/wt-Saline		wt/wt-LIRA		db/db-Saline		db/db-LIRA
7	7.75714	0.395209	7.65556	1.15878	13.3	4.32075	8.7	2.63186
8	8.775	1.09512	8.32222	0.819722	22.2	3.1847	10.3769	3.11238
9	8.5875	1.06696	6.85	0.725062	27.5	4.31014	13.0923	2.55097
10	8.6625	0.950094	8.43333	0.728011	29.5	4.1489	16.98	4.12736
11	8.025	0.615862	6.54444	0.534114	28.7	4.50739	21.1538	4.77103
12	7.6625	0.6255	7.9	0.924276	30.7	2.49154	15.5846	3.67102
13	8.225	0.801338	6.58889	0.868108	32.3	1.91416	13.6583	3.01374
14	7.6375	0.456501	6.65556	0.790745	32.9	1.22841	14.0923	3.86576
